# Supplementary material
Source: PubMed Central journal article supplement (PMC2737705)
Supplement: NIHMS125324-supplement-Supple_Fig.pdf [file NIHMS125324-supplement-Supple_Fig.pdf]

## Cell-type specific regulation of DARPP-32 phosphorylation by psychostimulant and antipsychotic drugs

Helen S. Bateup, Per Svenningsson, Mahomi Kuroiwa, Shiaoqing Gong,  
Akinori Nishi, Nathaniel Heintz & Paul Greengard

**Supplementary Figure 1**

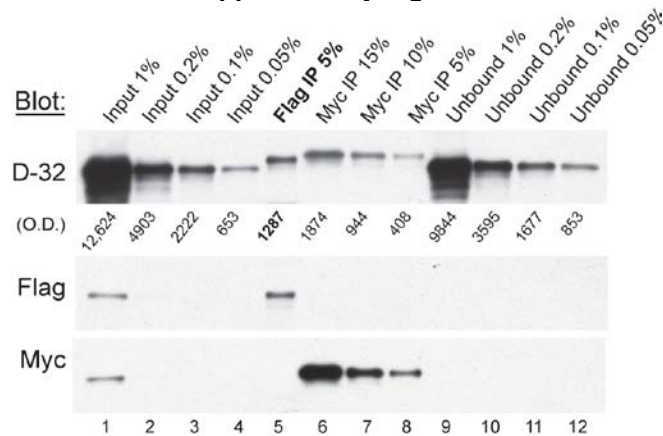

### Quantification of tagged DARPP-32 versus endogenous DARPP-32.

Striatal homogenates from D1R/D2R-DARPP-32 mice were incubated with Flag and Myc IP antibodies. To generate quantifiable data within the linear range of western blotting, we loaded a fixed percentage of Flag IP eluate (5%, lane 5) next to dilutions of the IP input, Myc IP, and unbound fractions, and blotted with DARPP-32, Flag and Myc antibodies. Note that there is no Flag or Myc tagged protein detectable in the unbound fractions; therefore the unbound signal in the DARPP-32 blot (top panel) corresponds to endogenous untagged DARPP-32.

We quantified the amount of DARPP-32 in 5% of the Flag IP (lane 5) compared to 1%, 0.2%, 0.1%, 0.05% dilutions of the unbound fraction (lanes 9-12). Quantification and comparison of optical density (O.D.) values revealed that 5% of the Flag IP'd DARPP-32 was equivalent to 0.075% of the unbound DARPP-32. This analysis was repeated with 4 different mice and yielded a similar value in all samples.

Based on this value, we calculated that there was 66.67 fold ( $= 5\%/0.075\%$ ) more DARPP-32 in the unbound fraction compared to the Flag IP. After correction for an IP efficiency of 50% ( $= 66.67/2$ ), we estimate that there was 33.3 times more endogenous DARPP-32 than Flag tagged DARPP-32 in these cells. In other words, the Flag-tagged DARPP-32 represented approximately 3% of the endogenous DARPP-32 protein. We also determined that 5% of the Flag IP'd DARPP-32 was equal to approximately 12% of the Myc IP'd DARPP-32, indicating about a 2.5 fold difference in expression between the Flag and Myc-tagged proteins. Comparison of Myc IP'd DARPP-32 and unbound DARPP-32 revealed a 90 fold difference in expression. Therefore, the Myc-tagged DARPP-32 represented approximately 1.10% of endogenous DARPP-32 protein.



three times in 1x PBS using the MPC to separate the beads each time. After the final wash, 30 $\mu$ L of non-reducing sample buffer (Pierce) was added and the beads were boiled for two minutes. Eluted supernatants were removed from the beads and samples were reduced with B-mercaptoethanol. Samples were stored at  $-80^{\circ}\text{C}$  until used for immunoblotting.

Flag IP/homogenate mixtures were spun down for 30 seconds at 13,000 rpm and unbound supernatant was removed to a fresh tube. This represented the total striatum sample. 1 $\mu$ L of this unbound supernatant was used in a BCA protein assay (Pierce) to determine protein concentration. Flag affinity gel was washed three times in 1x PBS and applied to the MPC to remove any residual magnetic beads. Flag IP's were eluted and stored at  $-80^{\circ}\text{C}$  as described above.

In addition to the anti-Myc-coupled Dynabeads, anti-Myc-coupled agarose (Novus) was also used for the Myc IP's with identical results. For this protocol, Myc-agarose was incubated with the striatal homogenate for 6 hours at  $4^{\circ}\text{C}$ . The unbound supernatant was subsequently incubated with Flag-affinity gel overnight at  $4^{\circ}\text{C}$ . Beads were washed and eluted as described above.
